# Supplementary material for: GC-MS based metabolomics identification of possible novel biomarkers for schizophrenia in peripheral blood mononuclear cells
Source: Royal Society of Chemistry journal article supplement (doi:10.1039/c4mb00157e), 2014-05-16
Supplement: c4mb00157e1.pdf [file c4mb00157e1.pdf]

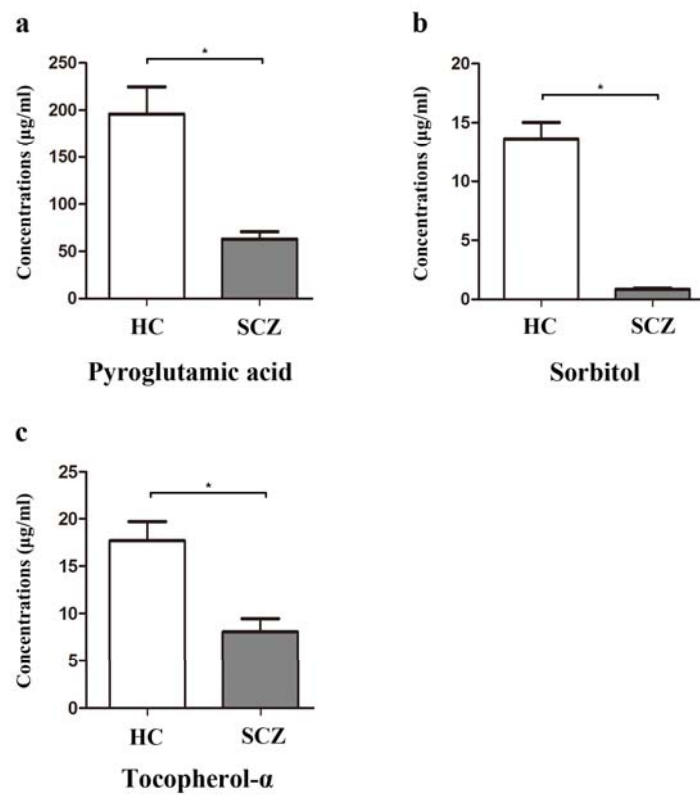

Supplemental fig.1. (a-c) the concentrations of diagnostic biomarkers in schizophrenia and healthy control groups. \* indicates  $p < 0.001$ .

**Supplemental Table 1. Individual demographic and clinical data of the recruited subjects**

| <b>Subjects</b> | <b>Training/Test set</b> | <b>Age (years)</b> | <b>Gender</b> | <b>Antipsychotics Use</b> |
|-----------------|--------------------------|--------------------|---------------|---------------------------|
| SZ 01           | Training set             | 29                 | Male          | NO                        |
| SZ 02           | Training set             | 37                 | Female        | NO                        |
| SZ 03           | Training set             | 41                 | Male          | NO                        |
| SZ 04           | Training set             | 56                 | Female        | Olanzapine                |
| SZ 05           | Training set             | 50                 | Female        | Olanzapine                |
| SZ 06           | Training set             | 29                 | Female        | NO                        |
| SZ 07           | Training set             | 28                 | Female        | NO                        |
| SZ 08           | Training set             | 21                 | Female        | NO                        |
| SZ 09           | Training set             | 21                 | Male          | NO                        |
| SZ 10           | Training set             | 56                 | Female        | Clozapine, chlorpromazine |
| SZ 11           | Training set             | 27                 | Male          | Olanzapine                |
| SZ 12           | Training set             | 31                 | Female        | Aripiprazole, quetiapine  |
| SZ 13           | Training set             | 17                 | Female        | NO                        |
| SZ 14           | Training set             | 20                 | Female        | NO                        |
| SZ 15           | Training set             | 17                 | Female        | NO                        |
| SZ 16           | Training set             | 49                 | Female        | NO                        |
| SZ 17           | Training set             | 28                 | Female        | NO                        |
| SZ 18           | Training set             | 42                 | Male          | Ziprasidone               |
| SZ 19           | Training set             | 26                 | Female        | Aripiprazole, olanzapine  |
| SZ 20           | Training set             | 26                 | Female        | Ziprasidone               |

|       |              |    |        |                         |
|-------|--------------|----|--------|-------------------------|
| SZ 21 | Training set | 24 | Male   | Olanzapine              |
| SZ 22 | Training set | 29 | Female | Olanzapine              |
| SZ 23 | Training set | 44 | Female | NO                      |
| SZ 24 | Training set | 30 | Male   | Olanzapine              |
| SZ 25 | Training set | 34 | Female | Olanzapine, ziprasidone |
| SZ 26 | Training set | 42 | Male   | Olanzapine              |
| SZ 27 | Training set | 69 | Female | NO                      |
| SZ 28 | Training set | 41 | Female | Risperidone             |
| SZ 29 | Training set | 56 | Female | Olanzapine              |
| SZ 30 | Training set | 32 | Female | NO                      |
| SZ 31 | Training set | 49 | Female | Olanzapine, ziprasidone |
| SZ 32 | Training set | 17 | Female | NO                      |
| SZ 33 | Training set | 47 | Male   | NO                      |
| SZ 34 | Training set | 35 | Male   | Olanzapine              |
| SZ 35 | Training set | 19 | Female | NO                      |
| SZ 36 | Training set | 20 | Male   | NO                      |
| SZ 37 | Training set | 15 | Female | NO                      |
| SZ 38 | Training set | 22 | Female | NO                      |
| SZ 39 | Training set | 27 | Male   | Risperidone             |
| SZ 40 | Training set | 39 | Male   | NO                      |
| SZ 41 | Training set | 21 | Male   | NO                      |
| SZ 42 | Training set | 19 | Male   | NO                      |
| SZ 43 | Training set | 43 | Male   | NO                      |

|       |              |    |        |                                           |
|-------|--------------|----|--------|-------------------------------------------|
| SZ 44 | Training set | 26 | Male   | NO                                        |
| SZ 45 | Training set | 44 | Male   | Sulpiride, risperidone                    |
| SZ 46 | Test set 1   | 21 | Male   | Olanzapine                                |
| SZ 47 | Test set 1   | 29 | Female | Ziprasidone                               |
| SZ 48 | Test set 1   | 22 | Female | Aripiprazole, olanzapine,<br>paliperidone |
| SZ 49 | Test set 1   | 22 | Female | Olanzapine                                |
| SZ 50 | Test set 1   | 20 | Female | Risperidone                               |
| SZ 51 | Test set 1   | 19 | Female | Haloperidol                               |
| SZ 52 | Test set 1   | 21 | Female | Olanzapine                                |
| SZ 53 | Test set 1   | 18 | Female | Olanzapine                                |
| SZ 54 | Test set 1   | 20 | Female | Risperidone                               |
| SZ 55 | Test set 1   | 17 | Female | Aripiprazole                              |
| SZ 56 | Test set 1   | 19 | Female | Clozapine                                 |
| SZ 57 | Test set 1   | 30 | Male   | Fluoxetine                                |
| SZ 58 | Test set 1   | 26 | Female | Quetiapine                                |
| SZ 59 | Test set 1   | 24 | Female | Olanzapine, quetiapine                    |
| SZ 60 | Test set 1   | 27 | Female | Olanzapine                                |
| SZ 61 | Test set 1   | 47 | Female | Olanzapine                                |
| SZ 62 | Test set 1   | 64 | Female | Olanzapine                                |
| SZ 63 | Test set 1   | 24 | Female | Olanzapine                                |
| SZ 64 | Test set 1   | 23 | Male   | Olanzapine, clozapine                     |
| SZ 65 | Test set 1   | 17 | Female | Aripiprazole                              |
| SZ 66 | Test set 1   | 18 | Female | Aripiprazole                              |

|       |              |    |        |              |
|-------|--------------|----|--------|--------------|
| SZ 67 | Test set 1   | 21 | Male   | Aripiprazole |
| SZ 68 | Test set 1   | 21 | Male   | Aripiprazole |
| SZ 69 | Test set 1   | 17 | Female | Aripiprazole |
| SZ 70 | Test set 2   | 37 | Female | NO           |
| SZ 71 | Test set 2   | 29 | Female | NO           |
| SZ 72 | Test set 2   | 21 | Female | NO           |
| SZ 73 | Test set 2   | 49 | Female | NO           |
| SZ 74 | Test set 2   | 28 | Female | NO           |
| SZ 75 | Test set 2   | 44 | Female | NO           |
| SZ 76 | Test set 2   | 22 | Female | NO           |
| SZ 77 | Test set 2   | 24 | Female | NO           |
| SZ 78 | Test set 2   | 30 | Female | NO           |
| SZ 79 | Test set 2   | 40 | Female | NO           |
| SZ 80 | Test set 2   | 23 | Male   | NO           |
| SZ 81 | Test set 2   | 41 | Male   | NO           |
| SZ 82 | Test set 2   | 21 | Male   | NO           |
| SZ 83 | Test set 2   | 47 | Male   | NO           |
| SZ 84 | Test set 2   | 20 | Male   | NO           |
| SZ 85 | Test set 2   | 19 | Male   | NO           |
| SZ 86 | Test set 2   | 47 | Male   | NO           |
| SZ 87 | Test set 2   | 31 | Male   | NO           |
| SZ 88 | Test set 2   | 40 | Male   | NO           |
| SZ 89 | Test set 2   | 26 | Male   | NO           |
| HC 01 | Training set | 29 | Female | NO           |
| HC 02 | Training set | 30 | Female | NO           |

|       |              |    |        |    |
|-------|--------------|----|--------|----|
| HC 03 | Training set | 31 | Male   | NO |
| HC 04 | Training set | 30 | Male   | NO |
| HC 05 | Training set | 19 | Female | NO |
| HC 06 | Training set | 30 | Female | NO |
| HC 07 | Training set | 25 | Male   | NO |
| HC 08 | Training set | 31 | Male   | NO |
| HC 09 | Training set | 28 | Male   | NO |
| HC 10 | Training set | 33 | Female | NO |
| HC 11 | Training set | 28 | Male   | NO |
| HC 12 | Training set | 33 | Female | NO |
| HC 13 | Training set | 28 | Female | NO |
| HC 14 | Training set | 29 | Male   | NO |
| HC 15 | Training set | 31 | Male   | NO |
| HC 16 | Training set | 28 | Female | NO |
| HC 17 | Training set | 30 | Male   | NO |
| HC 18 | Training set | 31 | Male   | NO |
| HC 19 | Training set | 34 | Male   | NO |
| HC 20 | Training set | 45 | Male   | NO |
| HC 21 | Training set | 39 | Female | NO |
| HC 22 | Training set | 55 | Male   | NO |
| HC 23 | Training set | 39 | Male   | NO |
| HC 24 | Training set | 45 | Female | NO |
| HC 25 | Training set | 43 | Female | NO |
| HC 26 | Training set | 33 | Female | NO |
| HC 27 | Training set | 36 | Female | NO |

|       |              |    |        |    |
|-------|--------------|----|--------|----|
| HC 28 | Training set | 48 | Female | NO |
| HC 29 | Training set | 58 | Female | NO |
| HC 30 | Training set | 35 | Female | NO |
| HC 31 | Training set | 39 | Female | NO |
| HC 32 | Training set | 40 | Female | NO |
| HC 33 | Training set | 45 | Female | NO |
| HC 34 | Training set | 44 | Female | NO |
| HC 35 | Training set | 43 | Female | NO |
| HC 36 | Training set | 43 | Female | NO |
| HC 37 | Training set | 40 | Male   | NO |
| HC 38 | Training set | 32 | Male   | NO |
| HC 39 | Training set | 41 | Female | NO |
| HC 40 | Training set | 38 | Male   | NO |
| HC 41 | Training set | 36 | Female | NO |
| HC 42 | Training set | 38 | Male   | NO |
| HC 43 | Training set | 45 | Male   | NO |
| HC 44 | Training set | 41 | Male   | NO |
| HC 45 | Training set | 30 | Female | NO |
| HC 46 | Training set | 29 | Male   | NO |
| HC 47 | Training set | 46 | Female | NO |
| HC 48 | Training set | 51 | Female | NO |
| HC 49 | Training set | 56 | Male   | NO |
| HC 50 | Training set | 52 | Female | NO |
| HC 51 | Test set 1   | 24 | Male   | NO |
| HC 52 | Test set 1   | 26 | Male   | NO |

|       |            |    |        |    |
|-------|------------|----|--------|----|
| HC 53 | Test set 1 | 26 | Female | NO |
| HC 54 | Test set 1 | 26 | Female | NO |
| HC 55 | Test set 1 | 22 | Female | NO |
| HC 56 | Test set 1 | 24 | Male   | NO |
| HC 57 | Test set 1 | 24 | Male   | NO |
| HC 58 | Test set 1 | 24 | Male   | NO |
| HC 59 | Test set 1 | 24 | Male   | NO |
| HC 60 | Test set 1 | 26 | Male   | NO |
| HC 61 | Test set 1 | 24 | Male   | NO |
| HC 62 | Test set 1 | 26 | Male   | NO |
| HC 63 | Test set 1 | 26 | Male   | NO |
| HC 64 | Test set 1 | 63 | Female | NO |
| HC 65 | Test set 1 | 24 | Male   | NO |
| HC 66 | Test set 1 | 26 | Female | NO |
| HC 67 | Test set 1 | 26 | Male   | NO |
| HC 68 | Test set 1 | 34 | Male   | NO |
| HC 69 | Test set 1 | 24 | Male   | NO |
| HC 70 | Test set 1 | 34 | Male   | NO |
| HC 71 | Test set 1 | 55 | Male   | NO |
| HC 72 | Test set 1 | 39 | Female | NO |
| HC 73 | Test set 1 | 55 | Male   | NO |
| HC 74 | Test set 1 | 59 | Male   | NO |
| HC 75 | Test set 1 | 49 | Male   | NO |
| HC 76 | Test set 1 | 45 | Female | NO |
| HC 77 | Test set 1 | 48 | Female | NO |



|        |            |    |        |    |
|--------|------------|----|--------|----|
| HC 78  | Test set 1 | 58 | Female | NO |
| HC 79  | Test set 1 | 61 | Female | NO |
| HC 80  | Test set 1 | 67 | Female | NO |
| HC 81  | Test set 1 | 59 | Female | NO |
| HC 82  | Test set 1 | 60 | Female | NO |
| HC 83  | Test set 1 | 58 | Female | NO |
| HC 84  | Test set 1 | 55 | Female | NO |
| HC 85  | Test set 1 | 39 | Female | NO |
| HC 86  | Test set 2 | 30 | Female | NO |
| HC 87  | Test set 2 | 37 | Female | NO |
| HC 88  | Test set 2 | 36 | Female | NO |
| HC 89  | Test set 2 | 36 | Female | NO |
| HC 90  | Test set 2 | 33 | Female | NO |
| HC 91  | Test set 2 | 29 | Female | NO |
| HC 92  | Test set 2 | 39 | Female | NO |
| HC 93  | Test set 2 | 33 | Female | NO |
| HC 94  | Test set 2 | 28 | Female | NO |
| HC 95  | Test set 2 | 38 | Female | NO |
| HC 96  | Test set 2 | 31 | Male   | NO |
| HC 97  | Test set 2 | 32 | Male   | NO |
| HC 98  | Test set 2 | 28 | Male   | NO |
| HC 99  | Test set 2 | 33 | Male   | NO |
| HC 100 | Test set 2 | 32 | Male   | NO |
| HC 101 | Test set 2 | 34 | Male   | NO |
| HC 102 | Test set 2 | 30 | Male   | NO |

|        |            |    |      |    |
|--------|------------|----|------|----|
| HC 103 | Test set 2 | 29 | Male | NO |
| HC 104 | Test set 2 | 34 | Male | NO |
| HC 105 | Test set 2 | 30 | Male | NO |

**Supplemental Table 2. The Mass parameters in SIM mode for quantitative analysis**

| <b>Metabolites</b>   | <b>Retention time<br/>(min)</b> | <b>Qualitative ion<br/>(m/z)</b> | <b>Quantitative ion<br/>(m/z)</b> | <b>Calibration curve<br/>equations</b> | <b>R<sup>2</sup></b> |
|----------------------|---------------------------------|----------------------------------|-----------------------------------|----------------------------------------|----------------------|
| Pyroglutamic acid    | 11.19                           | 230; 258                         | 156                               | Y=1.4773X+0.7061                       | 0.9997               |
| Sorbitol             | 16.01                           | 205; 217                         | 319                               | Y=1.1503X-0.0782                       | 0.9967               |
| Tocopherol- $\alpha$ | 25.12                           | 237; 277                         | 502                               | Y=0.1348X-0.0126                       | 0.9982               |

**Supplemental Table 3. Quantitative analysis of schizophrenic biomarkers in PBMCs**

| Samples | Pyroglutamic acid ( $\mu\text{g/ml}$ ) | Sorbitol ( $\mu\text{g/ml}$ ) | Tocopherol- $\alpha$ ( $\mu\text{g/ml}$ ) |
|---------|----------------------------------------|-------------------------------|-------------------------------------------|
| HC 86   | 108.47                                 | 3.02                          | 1.78                                      |
| HC 87   | 133.95                                 | 5.06                          | 23.51                                     |
| HC 88   | 111.66                                 | 4.57                          | 16.44                                     |
| HC 89   | 122.84                                 | 9.31                          | 28.35                                     |
| HC 90   | 114.19                                 | 15.76                         | 11.63                                     |
| HC 91   | 300.43                                 | 10.52                         | 9.47                                      |
| HC 92   | 162.87                                 | 15.82                         | 14.12                                     |
| HC 93   | 146.35                                 | 14.54                         | 13.17                                     |
| HC 94   | 72.50                                  | 14.82                         | 16.57                                     |
| HC 95   | 224.94                                 | 13.74                         | 11.09                                     |
| HC 96   | 162.23                                 | 8.28                          | 26.24                                     |
| HC 97   | 114.07                                 | 11.41                         | 31.01                                     |
| HC 98   | 377.66                                 | 26.04                         | 28.07                                     |
| HC 99   | 451.96                                 | 14.21                         | 4.37                                      |
| HC 100  | 433.37                                 | 26.59                         | 32.12                                     |
| HC 101  | 431.58                                 | 13.05                         | 19.96                                     |
| HC 102  | 117.21                                 | 16.20                         | 19.30                                     |
| HC 103  | 143.82                                 | 10.24                         | 7.61                                      |
| HC 104  | 66.00                                  | 19.26                         | 11.01                                     |
| HC 105  | 124.04                                 | 19.92                         | 27.54                                     |
| SZ 70   | 7.34                                   | 0.52                          | 2.36                                      |

|       |        |      |       |
|-------|--------|------|-------|
| SZ 71 | 25.97  | 0.56 | 5.70  |
| SZ 72 | 13.08  | 0.53 | 1.89  |
| SZ 73 | 28.31  | 0.88 | 6.64  |
| SZ 74 | 45.59  | 0.45 | 0.96  |
| SZ 75 | 48.89  | 1.42 | 8.86  |
| SZ 76 | 99.12  | 0.64 | 0.67  |
| SZ 77 | 77.17  | 0.61 | 9.10  |
| SZ 78 | 96.67  | 0.80 | 12.58 |
| SZ 79 | 69.04  | 1.14 | 21.91 |
| SZ 80 | 36.60  | 0.55 | 3.64  |
| SZ 81 | 42.93  | 0.46 | 2.66  |
| SZ 82 | 66.90  | 0.80 | 2.87  |
| SZ 83 | 111.79 | 0.84 | 9.09  |
| SZ 84 | 90.43  | 0.70 | 9.01  |
| SZ 85 | 113.15 | 1.41 | 21.43 |
| SZ 86 | 62.04  | 0.85 | 16.44 |
| SZ 87 | 32.34  | 2.17 | 5.19  |
| SZ 88 | 70.79  | 0.50 | 10.86 |
| SZ 89 | 121.29 | 1.29 | 9.35  |
